# Supplementary material for: Complementary Catalysis and Analysis Within Solid-State Additively Manufactured Metal Micro-Flow Reactors
Source: Research Square preprint supplement (doi:10.21203/rs.3.rs-870886/v1), 2021-09-17

Supplementary Information for:

## Complementary Catalysis and Analysis within Solid-State Additively Manufactured Metal Micro-Flow Reactors

---

T. Monaghan<sup>a</sup>, M. J. Harding<sup>b</sup>, S. D. R. Christie<sup>c</sup>, R. A. Harris<sup>d</sup> and R. J. Friel<sup>e\*</sup>

<sup>a</sup> School of Mechanical, Electrical and Manufacturing Engineering, Loughborough University, Loughborough, United Kingdom

<sup>b</sup> School of Chemical and Bioprocess Engineering, University College Dublin, Dublin, Ireland

<sup>c</sup> Department of Chemistry, Loughborough University, Loughborough, United Kingdom

<sup>d</sup> School of Mechanical Engineering, University of Leeds, Leeds, United Kingdom

<sup>e</sup> School of Information Technology, Halmstad University, Halmstad, Sweden

Author contact information: [ross.friel@hh.se](mailto:ross.friel@hh.se)

### Device Fabrication

#### Aluminium 3DP Reactor

Using the same Ultrasonic Additive Manufacturing (UAM) system as that used to manufacture the Copper reactor, an Aluminium reactor of the identical design was also manufactured. This device was manufactured from a combination of Al 5052 and 6061 alloys.

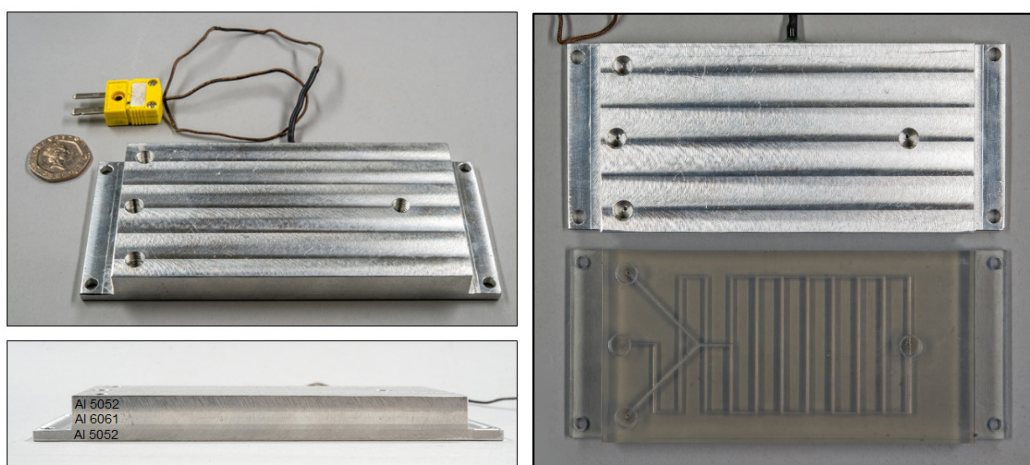

Figure S1. Images of aluminium 3D-printed reactor and its SLA formed prototype

## Additional Images of Catalytic Copper Reactor

Additional images of the catalytically active Copper reactor employed in this work are shown in Figure S2.

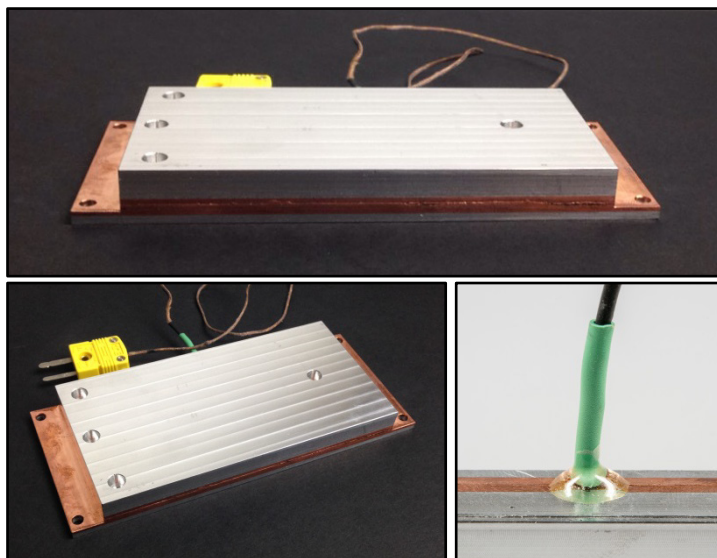

Figure S2. Additional images of copper flow reactor detailing the inserted thermocouple for temperature monitoring

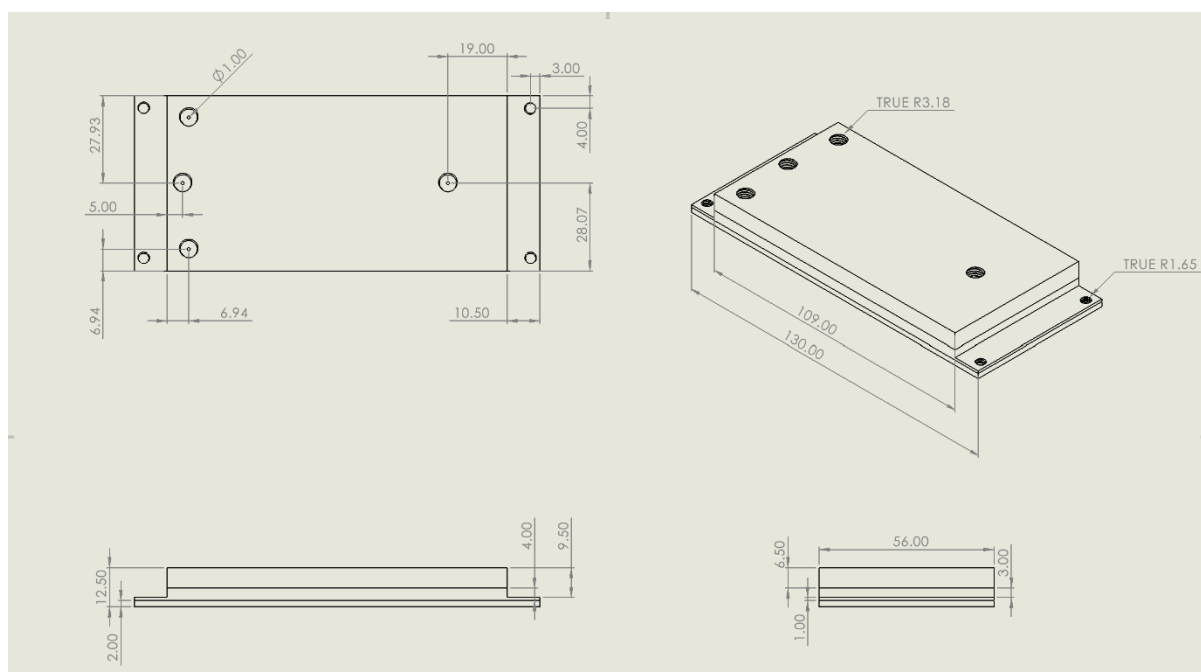

Figure S3. Dimensioned drawings of the copper flow reactor

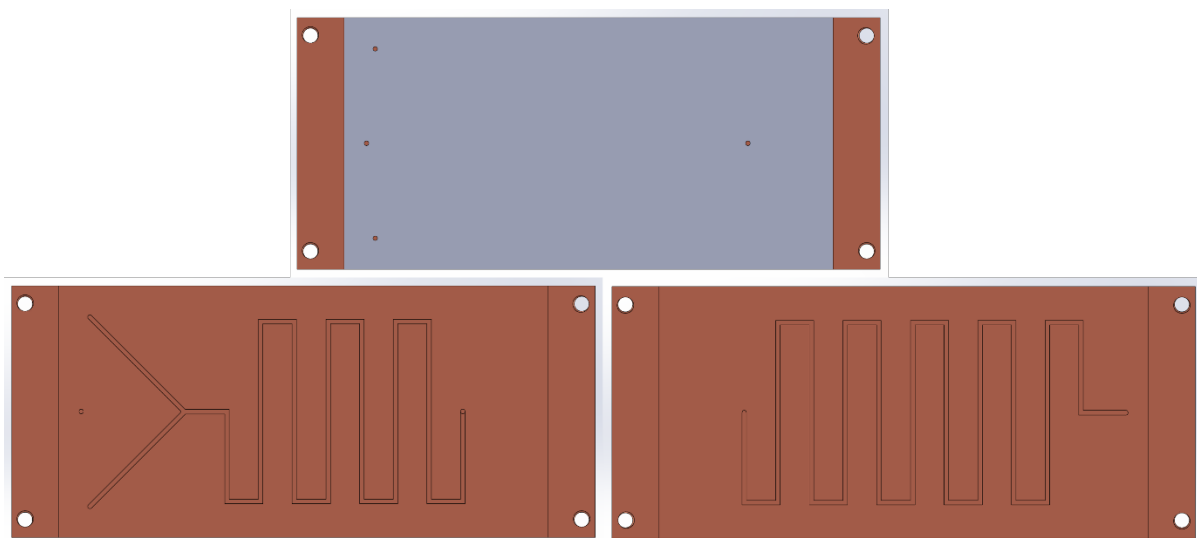

Figure S4. Internal fluidic pathways for the copper flow reactor

## Triazole Library Design of Experiments Data

The Huisgen 1,3-dipolar cycloaddition of alkynes and azides to yield 1,2,3-triazoles is considered the premier example of a "Click Reaction". "Click Chemistry" is a term initially introduced by Professor K. B. Sharpless in 2001 to describe high yielding reactions, wide in scope, stereospecific, simple to perform, and can be conducted in easily removable or benign solvents.

### Model Reaction

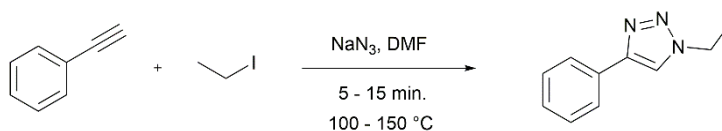

Table S1. Conditions Screened

| Variable             | Low | Medium | High |
|----------------------|-----|--------|------|
| Temperature [°C]     | 100 | 125    | 150  |
| Residence Time [min] | 5   | 10     | 15   |

Design of experiments was performed using a 3 level, full factorial design with an additional two centre point repeats for a total of 11 experimental runs.

Table S2. DOE Results

| Temperature<br>[°C] | Residence time<br>[min] | HPLC Area<br>% Product |
|---------------------|-------------------------|------------------------|
| 100                 | 5                       | 9.69                   |
| 125                 | 5                       | 22.37                  |
| 145                 | 5                       | 26.26                  |
| 100                 | 10                      | 16.25                  |
| 125                 | 10                      | 33.24                  |
| 145                 | 10                      | 59.57                  |
| 100                 | 16.7                    | 30.82                  |
| 125                 | 16.7                    | 32.03                  |
| 145                 | 16.7                    | 50.97                  |
| 125                 | 10                      | 32.7                   |
| 125                 | 10                      | 46.23                  |

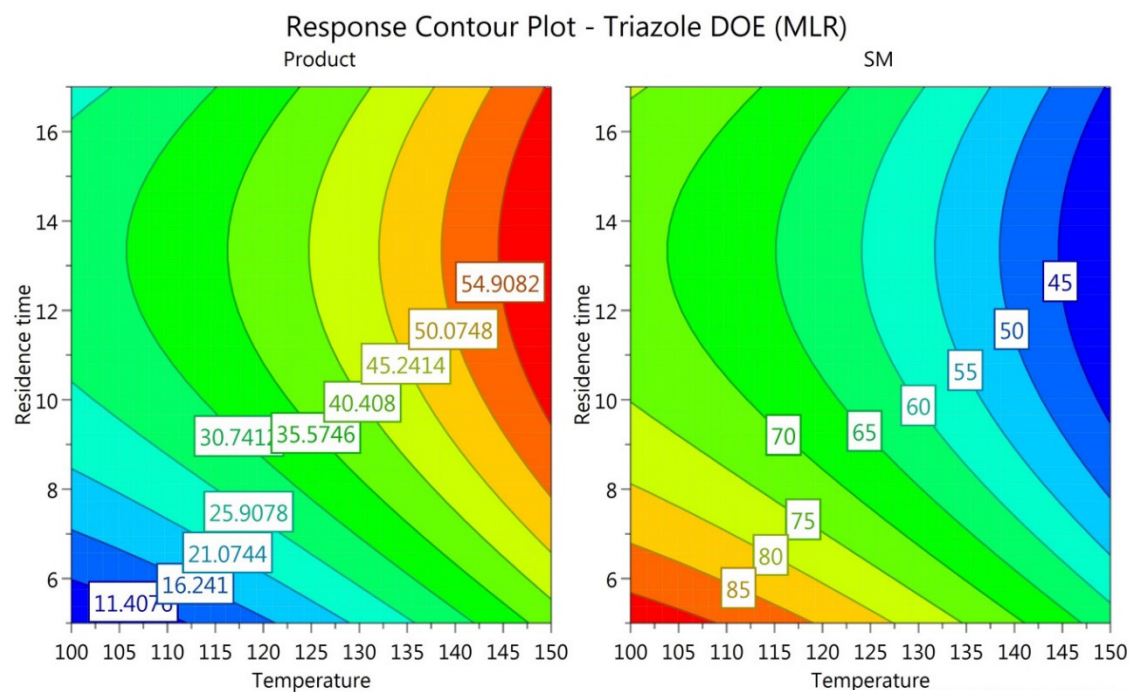

Figure S5. Response Contour Plot (RCP) for the optimisation DOE for a) product and b) starting material

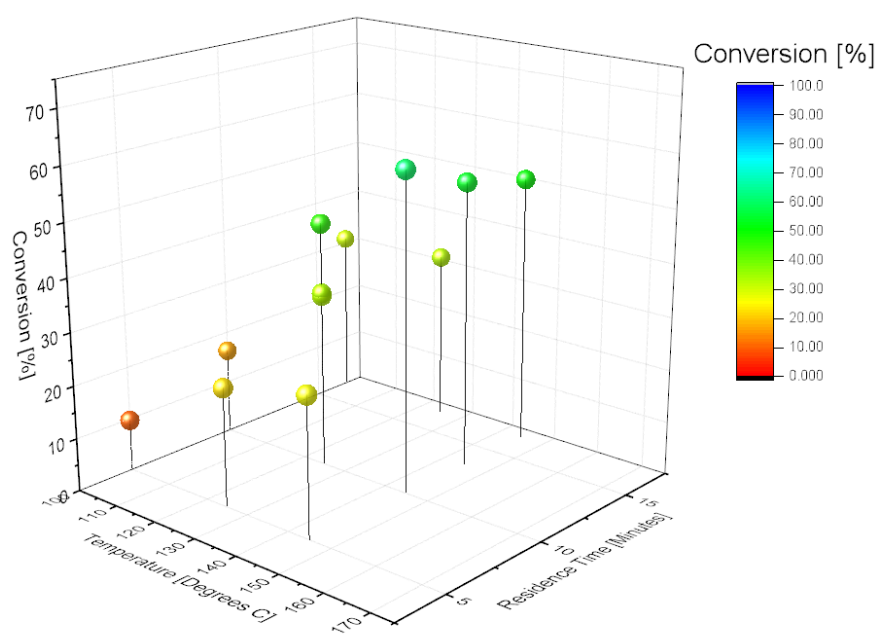

Figure S6. Ball and Stick diagram for individual responses in the DOE

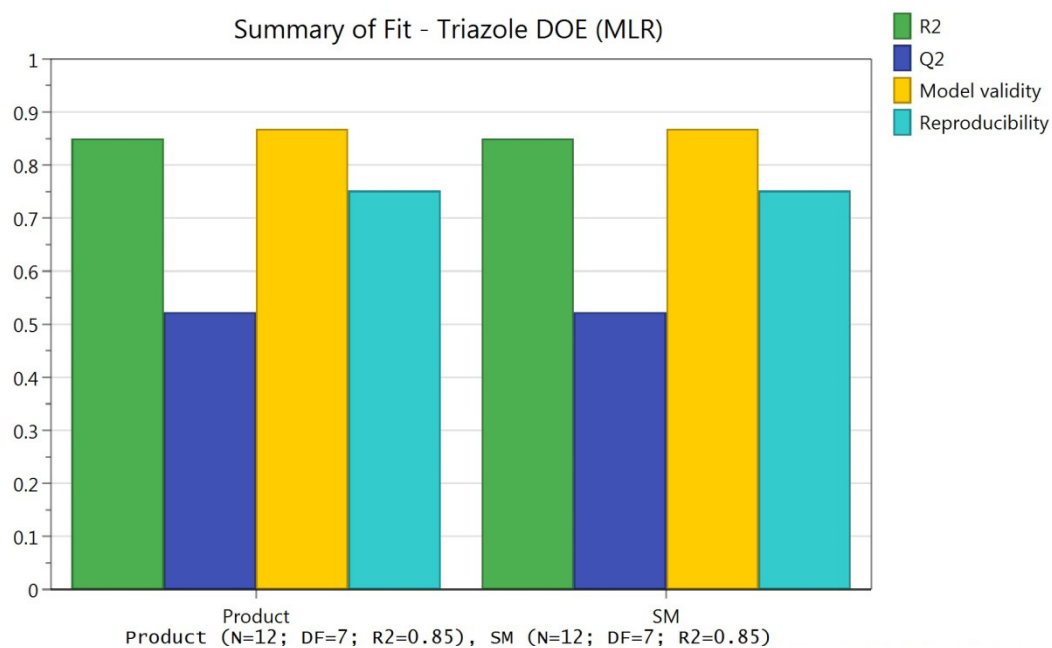

Figure S7. Summary of fit information for DOE model

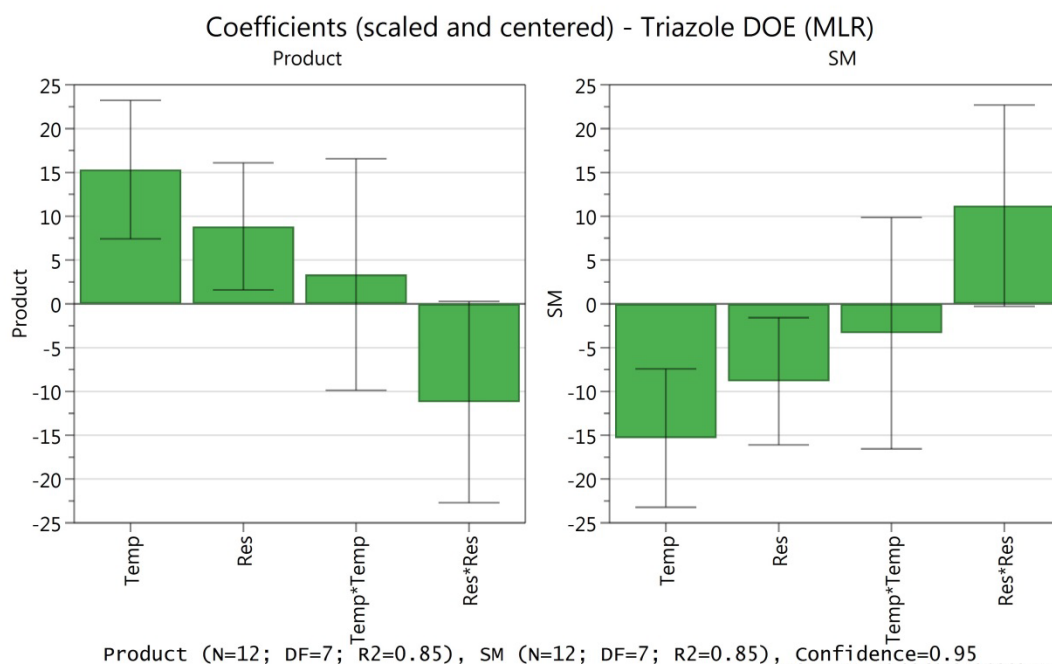

Figure S8. Coefficients for model generated from DOE results

Table S3. Coefficient list for product and starting material plots

| Product        | Coeff. SC | Std. Err. | P            | Conf. int(±) |
|----------------|-----------|-----------|--------------|--------------|
| Constant       | 38.8323   | 4.22064   | 9.29564e-005 | 10.3276      |
| Temperature    | 15.5484   | 3.95008   | 0.00765766   | 9.66556      |
| Residence time | 8.91594   | 3.35554   | 0.0376706    | 8.21078      |
| Temp*Temp      | 3.63107   | 6.33761   | 0.587498     | 15.5077      |
| Res*Res        | -11.4248  | 5.45848   | 0.0812566    | 13.3565      |
|                |           |           |              |              |
|                |           |           |              |              |
| N = 11         | Q2 =      | 0.361     | Cond. no. =  | 3.677        |
| DF = 6         | R2 =      | 0.823     | RSD =        | 8.049        |
|                | R2 adj. = | 0.704     |              |              |
|                |           |           | Confidence = | 0.95         |
|                |           |           |              |              |
| SM             | Coeff. SC | Std. Err. | P            | Conf. int(±) |
| Constant       | 61.1677   | 4.22064   | 6.76579e-006 | 10.3276      |
| Temperature    | -15.5484  | 3.95007   | 0.00765764   | 9.66556      |
| Residence time | -8.91595  | 3.35554   | 0.0376706    | 8.21077      |
| Temp*Temp      | -3.63107  | 6.33761   | 0.587498     | 15.5077      |
| Res*Res        | 11.4248   | 5.45848   | 0.081257     | 13.3565      |
|                |           |           |              |              |
|                |           |           |              |              |
| N = 11         | Q2 =      | 0.361     | Cond. no. =  | 3.677        |
| DF = 6         | R2 =      | 0.823     | RSD =        | 8.049        |
|                | R2 adj. = | 0.704     |              |              |
|                |           |           | Confidence = | 0.95         |

All summary terms are of suitable magnitude to suggest that the DOE model generated is good and able to be used with a high degree of reliability. Data suggest that higher temperatures and moderate residence times are favourable for achieving high degrees of product conversion. P values indicate that the model is linear, as the squared terms Temp\*Temp and Res\*Res are <0.05 and therefore these 2<sup>nd</sup> order effects are insignificant. Using inbuilt optimisation software in the MODDE Pro software generated the following conditions for maximising product conversion and minimising starting materials;

Table S4. Optimised Conditions based on DOE Model

| Temperature | Residence Time | Predicted Product | Obtained Product |
|-------------|----------------|-------------------|------------------|
| [°C]        | [minutes]      | Conversion [%]    | Conversion [%]   |
| 150         | 13.3           | 55.3              | 53.9             |

\* The close match between predicted and observed values signify the high reliability of the generated model

### Hydrogen Peroxide Treatment

In order to fully maximise yields, an additional pre-run was performed in which hydrogen peroxide (36%) was flowed through the reaction chamber. The optimised reaction conditions were then employed to establish if this peroxidation could increase conversions. Whilst all results yielded significant increases in product conversion, a slight drop off was observed after 2.5 minutes, and this was therefore used as the minimum exposure time (Table 6).

Table S5. Results of Peroxide surface treatment.

| Temperature | Residence Time | Hydrogen Peroxide Pre-run | Product Conversion |
|-------------|----------------|---------------------------|--------------------|
| [°C]        | [minutes]      | Residence Time [minutes]  | [%]                |
| 150         | 13.3           | 0.5                       | 91                 |
| 150         | 13.3           | 1.0                       | 93                 |
| 150         | 13.3           | 2.5                       | > 95               |
| 150         | 13.3           | 5.0                       | > 95               |
| 150         | 13.3           | 10                        | > 95               |
| 150         | 13.3           | 15                        | > 95               |

## Library Synthesis Procedure

### Terminal Acetylenes Used

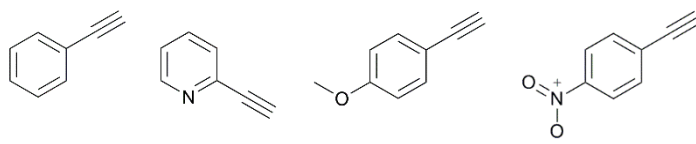

### Alkyl Halides Used

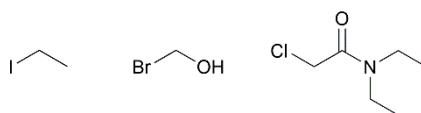

Separate solutions of sodium azide (0.25 M, 4:1 DMF:H<sub>2</sub>O) iodoethane (0.25 M, DMF) and phenyl acetylene (0.125 M, DMF) were prepared. 3 mL aliquots of each solution were mixed and pumped through the reactor at 75  $\mu\text{L}\cdot\text{min}^{-1}$  and 145 °C. The total volume was collected into a *vial* and diluted with 10 mL ethyl acetate. The sample solution was washed with 3 x 10 mL water. The aqueous layers were combined and extracted with 10 mL ethyl acetate, the organic layers were then combined, washed with 3 x 10 mL brine, dried with MgSO<sub>4</sub> and filtered before the solvent was removed *in vacuo*. Samples were purified by column chromatography on silica gel using ethyl acetate prior to analysis *via* NMR, high-resolution mass spectroscopy and HPLC.

## Triazole Library Synthesis Characterisation Data

### 1-Ethyl-4-phenyl-1H-1,2,3-triazole

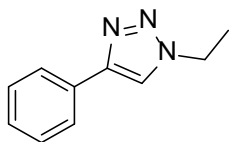

<sup>1</sup>H NMR (CDCl<sub>3</sub> 400 MHz)  $\delta$  1.59 (t, 3H,  $J$  = 7 Hz), 4.45 (q, 2H,  $J$  = 7 Hz), 7.33-7.35 (m, 1H), 7.40-7.44 (m, 2H), 7.77 (s, 1H), 7.82-7.84 (m, 2H); <sup>13</sup>C NMR (CDCl<sub>3</sub> 100 MHz)  $\delta$  15.8, 45.4, 119.0, 125.9, 128.3, 129.0, 130.9, 148.1; HRMS:  $m/z$  calculated for C<sub>10</sub>H<sub>11</sub>N<sub>3</sub>Na [M+Na]<sup>+</sup> 196.0851; found: 196.0844.

### 2-(4-Phenyl-1*H*-1,2,3-triazol-1-yl)ethan-1-ol

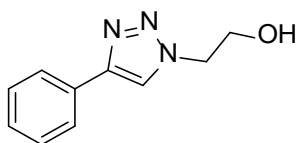

$^1\text{H}$  NMR ( $\text{CDCl}_3$  400 MHz)  $\delta$  4.14 (t, 2H,  $J$  = 5 Hz), 4.54 (t, 2H,  $J$  = 5 Hz), 7.33 (t, 1H,  $J$  = 7 Hz), 7.41 (t, 2H,  $J$  = 7 Hz), 7.76 (d, 2H,  $J$  = 7 Hz), 7.85 (s, 1H);  $^{13}\text{C}$  NMR ( $\text{CDCl}_3$  100 MHz)  $\delta$  52.9, 61.5, 121.1, 125.8, 128.4, 129.0, 130.5, 147.8; HRMS:  $m/z$  calculated for  $\text{C}_{10}\text{H}_{11}\text{N}_3\text{ONa}$   $[\text{M}+\text{Na}]^+$  212.0800; found  $m/z$  212.0792.

### *N,N*-diethyl-2-(4-phenyl-1*H*-1,2,3-triazol-1-yl)acetamide

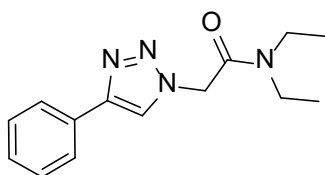

$^1\text{H}$  NMR ( $\text{CDCl}_3$  400 MHz)  $\delta$  1.15 (t, 3H,  $J$  = 7 Hz), 1.26 (t, 3H,  $J$  = 7 Hz), 3.40-3.47 (m, 4H), 5.24 (s, 2H), 7.30-7.34 (m, 1H), 7.40-7.44 (m, 2H), 7.82-7.86 (m, 2H), 8.04 (s, 1H);  $^{13}\text{C}$  NMR ( $\text{CDCl}_3$  100 MHz)  $\delta$  13.0, 14.6, 41.2, 42.2, 51.1, 121.6, 125.9, 128.3, 129.0, 130.7, 148.2, 164.2; HRMS:  $m/z$  calculated for  $\text{C}_{14}\text{H}_{18}\text{N}_4\text{ONa}$   $[\text{M}+\text{Na}]^+$  281.1378; found  $m/z$  281.1369.

### 1-Ethyl-4-(4-methoxyphenyl)-1*H*-1,2,3-triazole

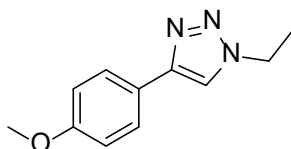

$^1\text{H}$  NMR ( $\text{CDCl}_3$  400 MHz)  $\delta$  1.59 (t, 3H,  $J$  = 7 Hz), 3.84 (s, 3H), 4.44 (q, 2H,  $J$  = 7 Hz), 6.96 (d, 2H,  $J$  = 9 Hz), 7.69 (s, 1H), 7.75 (d, 2H,  $J$  = 9 Hz);  $^{13}\text{C}$  NMR ( $\text{CDCl}_3$  100 MHz)  $\delta$  15.8, 45.5, 55.5, 114.4, 118.3, 127.2, 147.9, 159.7; HRMS:  $m/z$  calculated for  $\text{C}_{11}\text{H}_{13}\text{N}_3\text{ONa}$   $[\text{M}+\text{Na}]^+$  226.0956; found  $m/z$  226.0949.

### 2-(4-(Methoxyphenol)-1*H*-1,2,3-triazol-1-yl)ethan-1-ol

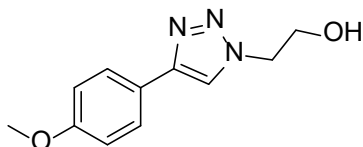

$^1\text{H}$  NMR ( $\text{CDCl}_3$  400 MHz)  $\delta$  3.84 (s, 3H), 4.13 (t, 2H,  $J$  = 5 Hz), 4.45 (t, 2H,  $J$  = 5 Hz), 6.89 (d, 2H,  $J$  = 9 Hz), 7.67 (d, 2H,  $J$  = 9 Hz), 7.74 (s, 1H);  $^{13}\text{C}$  NMR ( $\text{CDCl}_3$  100 MHz)  $\delta$  52.9, 55.5, 61.5, 114.4, 120.3, 123.2, 127.1, 147.6, 159.8; HRMS:  $m/z$  calculated for  $\text{C}_{11}\text{H}_{13}\text{N}_3\text{O}_2\text{Na}$   $[\text{M}+\text{Na}]^+$  242.0905; found  $m/z$  242.0897.

### ***N,N*-diethyl-2-(4-(*-*methoxyphenyl)-1*H*-1,2,3-triazol-1-yl)acetamide**

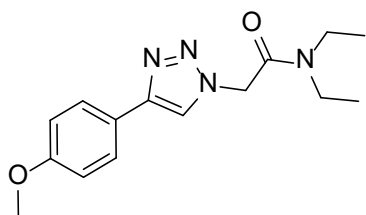

$^1\text{H}$  NMR ( $\text{CDCl}_3$  400 MHz)  $\delta$  1.12 (t, 3H,  $J = 7$  Hz), 1.23 (t, 3H,  $J = 7$  Hz), 3.40 (q, 4H,  $J = 7$  Hz), 3.82 (s, 2H), 5.20 (s, 2H), 6.93 (d, 2H,  $J = 9$  Hz), 7.75 (d, 2H,  $J = 9$  Hz), 7.92 (s, 1H);  $^{13}\text{C}$  NMR ( $\text{CDCl}_3$  100 MHz)  $\delta$  13.0, 14.6, 41.2, 42.2, 51.2, 55.5, 114.4, 120.8, 123.4, 127.3, 148.0, 159.8, 164.2; HRMS:  $m/z$  calculated for  $\text{C}_{15}\text{H}_{20}\text{N}_4\text{O}_3\text{Na}$   $[\text{M}+\text{Na}]^+$  311.1484; found  $m/z$  311.1474.

### **2-(1-Ethyl-1*H*-1,2,3-triazol-4-yl)pyridine**

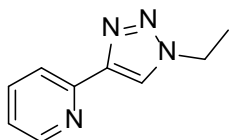

$^1\text{H}$  NMR ( $\text{CDCl}_3$  400 MHz)  $\delta$  1.60 (t, 3H,  $J = 7$  Hz), 4.48 (q, 2H,  $J = 7$  Hz), 7.20-7.24 (m, 1H), 7.75-7.80 (m, 1H), 8.15 (s, 1H), 8.15-8.20 (m, 1H), 8.55-8.59 (m, 1H);  $^{13}\text{C}$  NMR ( $\text{CDCl}_3$  100 MHz)  $\delta$  15.6, 45.7, 12.4, 121.5, 123.0, 137.2, 148.6, 149.5, 150.5; HRMS:  $m/z$  calculated for  $\text{C}_9\text{H}_{10}\text{N}_4\text{Na}$   $[\text{M}+\text{Na}]^+$  197.0803; found  $m/z$  197.0797.

### **2-(4-(Pyridine-2-yl)-1*H*-1,2,3-triazol-1-yl)ethan-1-ol**

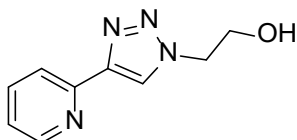

$^1\text{H}$  NMR ( $\text{CDCl}_3$  400 MHz)  $\delta$  4.13 (t, 2H,  $J = 5$  Hz), 4.56 (t, 2H,  $J = 5$  Hz), 7.21 (t, 1H,  $J = 5$  Hz), 7.75 (t, 1H,  $J = 8$  Hz), 8.07 (d, 1H,  $J = 8$  Hz), 8.30 (s, 1H), 8.46 (d, 1H,  $J = 5$  Hz);  $^{13}\text{C}$  NMR ( $\text{CDCl}_3$  100 MHz)  $\delta$  53.2, 61.3, 120.5, 123.1, 123.7, 137.4, 147.8, 149.2, 150.1; HRMS:  $m/z$  calculated for  $\text{C}_9\text{H}_{10}\text{N}_4\text{ONa}$   $[\text{M}+\text{Na}]^+$  213.0752; found  $m/z$  213.0745.

### ***N,N*-diethyl-2-(4-(pyridine-2-yl)-1*H*-1,2,3-triazol-1-yl)acetamide**

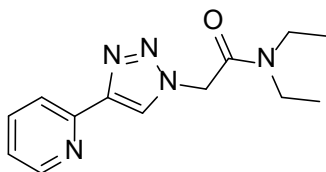

$^1\text{H}$  NMR ( $\text{CDCl}_3$  400 MHz)  $\delta$  1.14 (t, 3H,  $J = 7$  Hz), 1.26 (t, 3H,  $J = 7$  Hz), 3.42 (m, 4H), 5.25 (s, 2H), 7.19-7.23 (m, 1H), 7.74-7.78 (m, 1H), 8.14 (d, 1H,  $J = 8$  Hz), 8.35 (s, 1H), 8.57 (d, 1H,  $J = 5$  Hz);  $^{13}\text{C}$  NMR ( $\text{CDCl}_3$

100 MHz)  $\delta$  13.0, 14.6, 41.2, 42.1, 51.2, 120.5, 123.0, 124.1, 137.0, 148.8, 149.6, 150.4, 163.9; HRMS:  $m/z$  calculated for  $C_{13}H_{17}N_5ONa$   $[M+Na]^+$  282.1331; found  $m/z$  282.1320.

### 1-Ethyl-4-(4-nitrophenyl)-1H-1,2,3-triazole

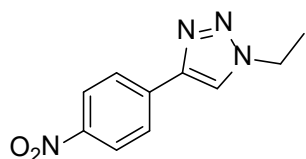

$^1H$  NMR ( $(CD_3)_2SO$  400 MHz)  $\delta$  1.52 (t, 3H,  $J$  = 7 Hz), 4.49 (q, 2H,  $J$  = 7 Hz), 8.14 (d, 2H,  $J$  = 8 Hz), 8.35 (d, 2H,  $J$  = 8 Hz), 8.90 (s, 1H);  $^{13}C$  NMR ( $CDCl_3$  100 MHz)  $\delta$  15.7, 45.8, 120.6, 124.5, 126.3, 137.2, 145.9, 147.5; HRMS:  $m/z$  calculated for  $C_{10}H_{11}N_4O_2$   $[M+H]^+$  219.0877; found  $m/z$  219.0876.

### 2-(4-(4-Nitrophenyl)-1H-1,2,3-triazol-1-yl)ethan-1-ol

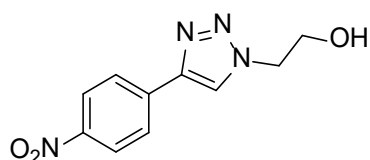

$^1H$  NMR ( $(CD_3)_2SO$  400 MHz)  $\delta$  3.86 (t, 2H,  $J$  = 6 Hz), 4.50 (t, 2H,  $J$  = 6 Hz), 5.14 (s, br, 1H), 8.16 (d, 1H,  $J$  = 9 Hz), 8.34 (d, 1H,  $J$  = 9 Hz);  $^{13}C$  NMR ( $(CD_3)_2SO$  100 MHz)  $\delta$  52.7, 59.7, 124.0, 124.4, 125.9, 137.4, 144.2, 146.5; HRMS:  $m/z$  calculated for  $C_{10}H_{11}N_4O_3$   $[M+H]^+$  235.0826; found  $m/z$  235.0824.

### *N,N*-diethyl-2-(4-(4-nitrophenyl)-1H-1,2,3-triazol-1-yl)acetamide

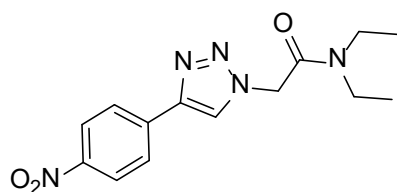

$^1H$  NMR ( $CDCl_3$  400 MHz)  $\delta$  1.17 (t, 3H,  $J$  = 7 Hz), 1.31 (t, 3H,  $J$  = 7 Hz), 3.41-3.50 (m, 4H), 8.02 (d, 2H,  $J$  = 9 Hz), 8.21 (s, 1H), 8.28 (d, 2H,  $J$  = 9 Hz);  $^{13}C$  NMR ( $CDCl_3$  100 MHz)  $\delta$  12.8, 14.4, 41.2, 42.0, 50.8, 123.1, 124.3, 126.2, 136.9, 145.8, 147.3, 163.6; HRMS:  $m/z$  calculated for  $C_{14}H_{17}N_5O_3Na$   $[M+Na]^+$  326.1229; found  $m/z$  326.1219.

# H NMR Spectra for Previously Unreported Compounds

## N,N-diethyl-2-(4-(pyridine-2-yl)-1H-1,2,3-triazol-1-yl)acetamide

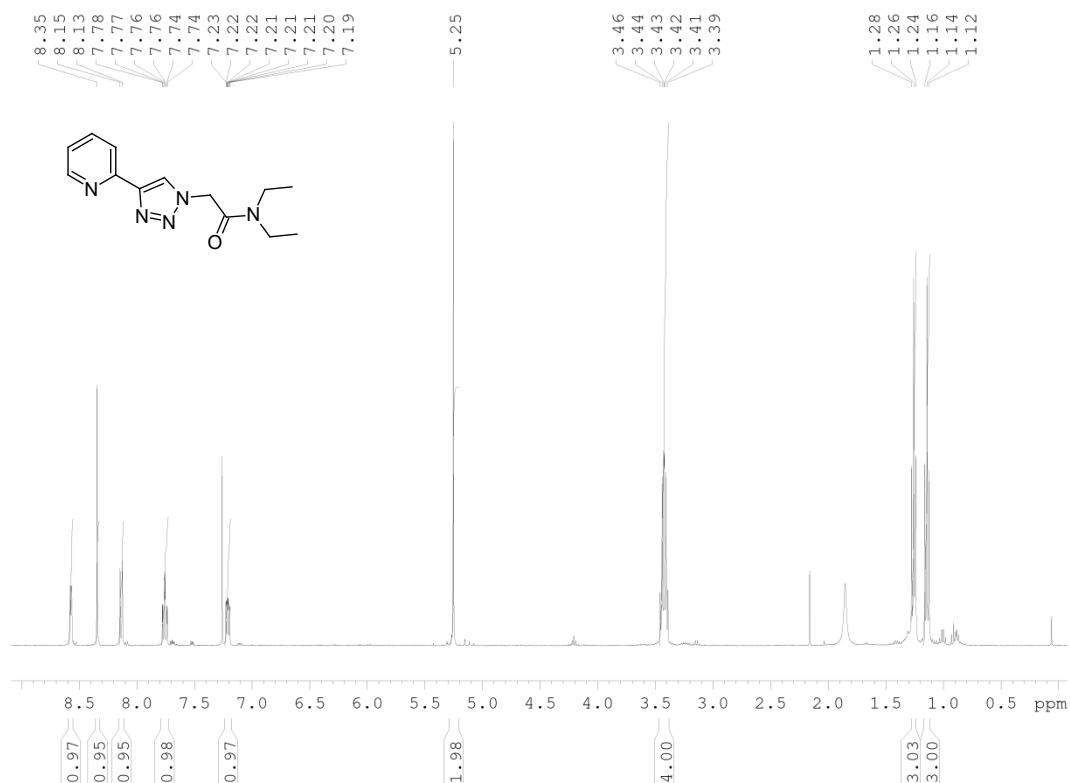

## 1-Ethyl-4-(4-methoxyphenyl)-1H-1,2,3-triazole

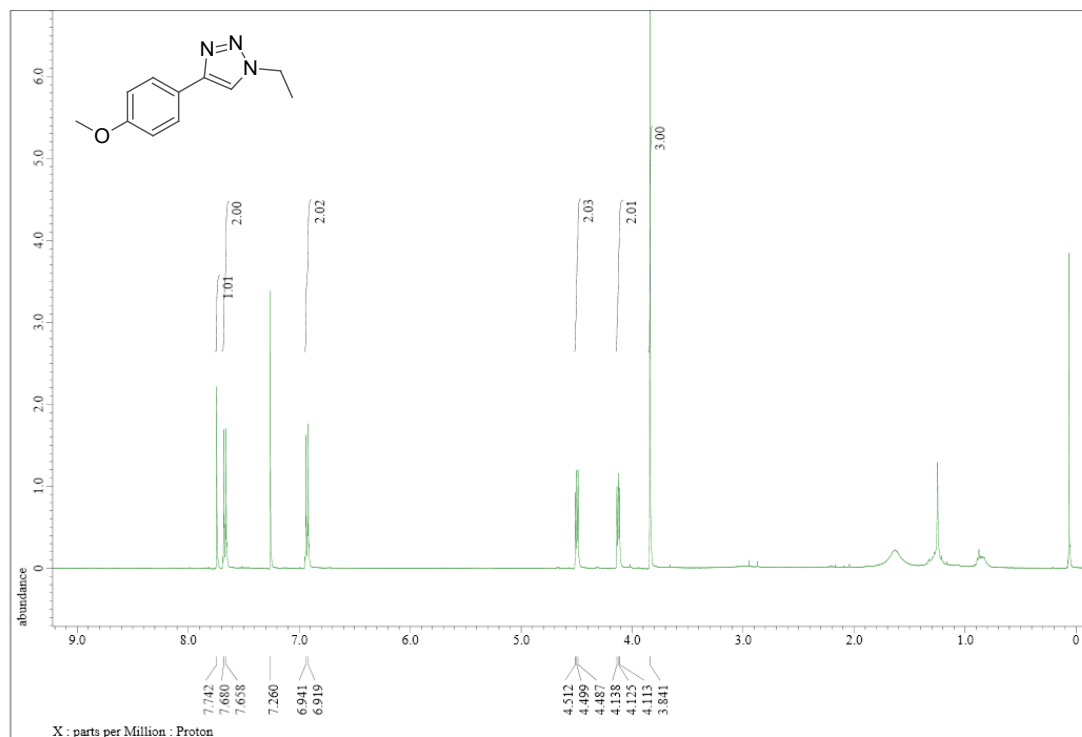

## N,N-diethyl-2-(4-(*-*methoxyphenyl)-1*H*-1,2,3-triazol-1-yl)acetamide

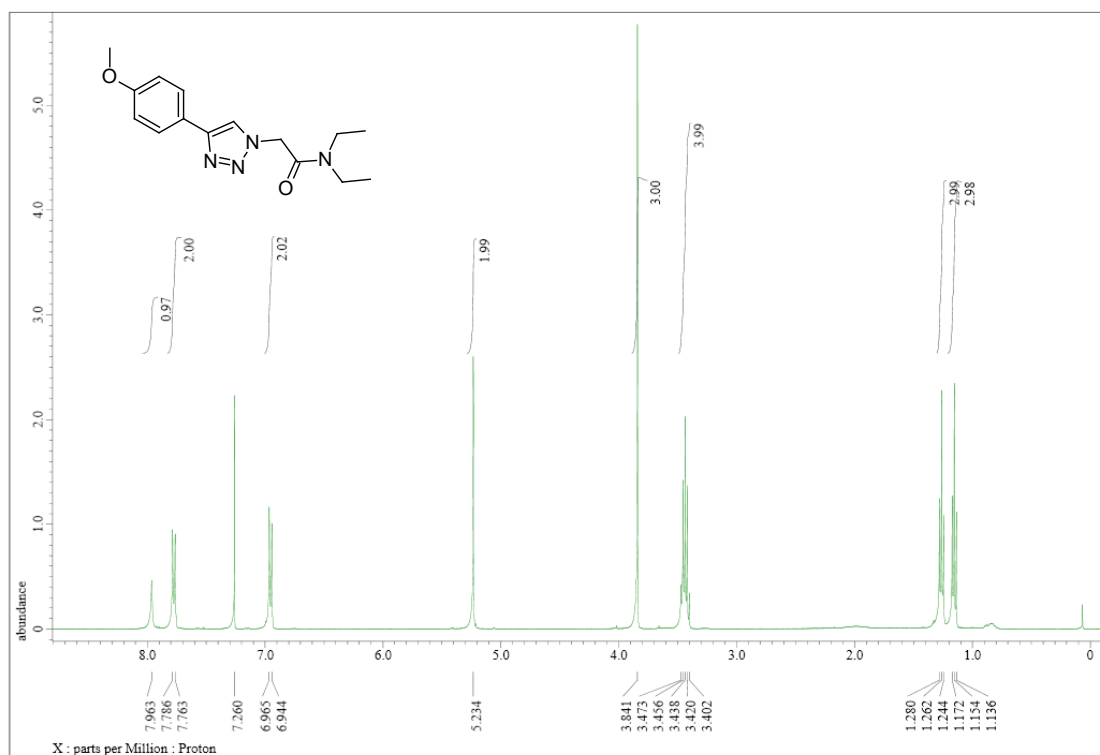

## 2-(4-(4-nitrophenyl)-1*H*-1,2,3-triazol-1-yl)ethan-1-ol

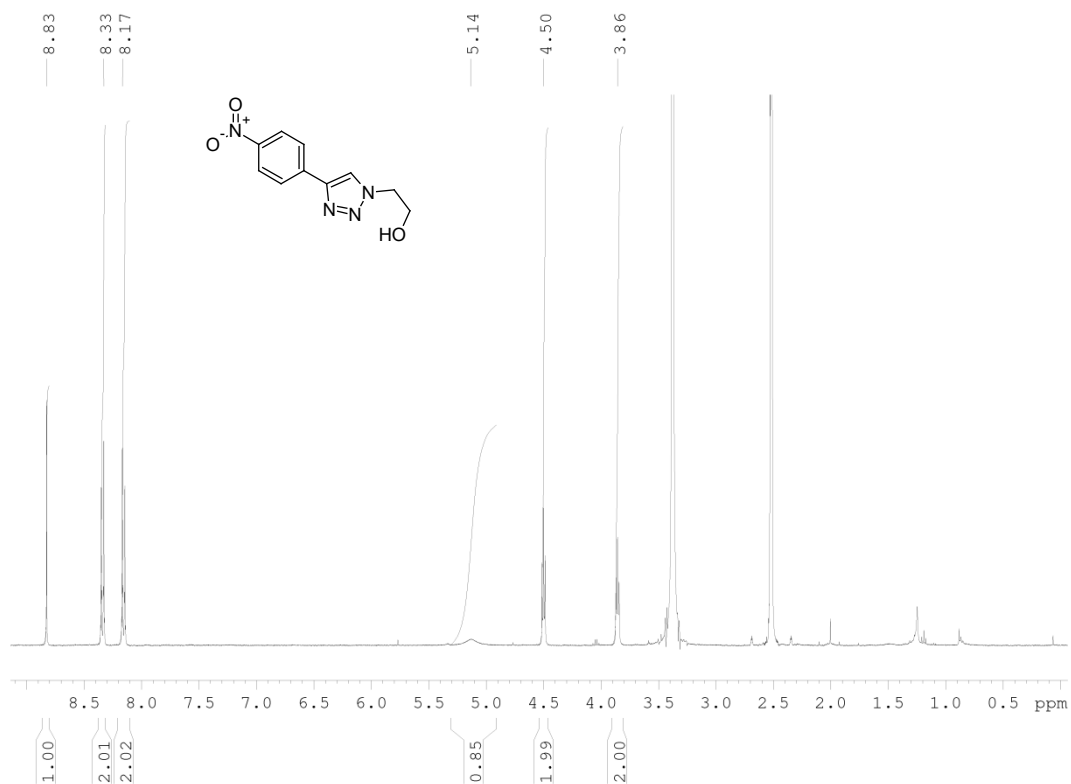

***N,N*-diethyl-2-(4-(4-nitrophenyl)-1*H*-1,2,3-triazol-1-yl)acetamide**

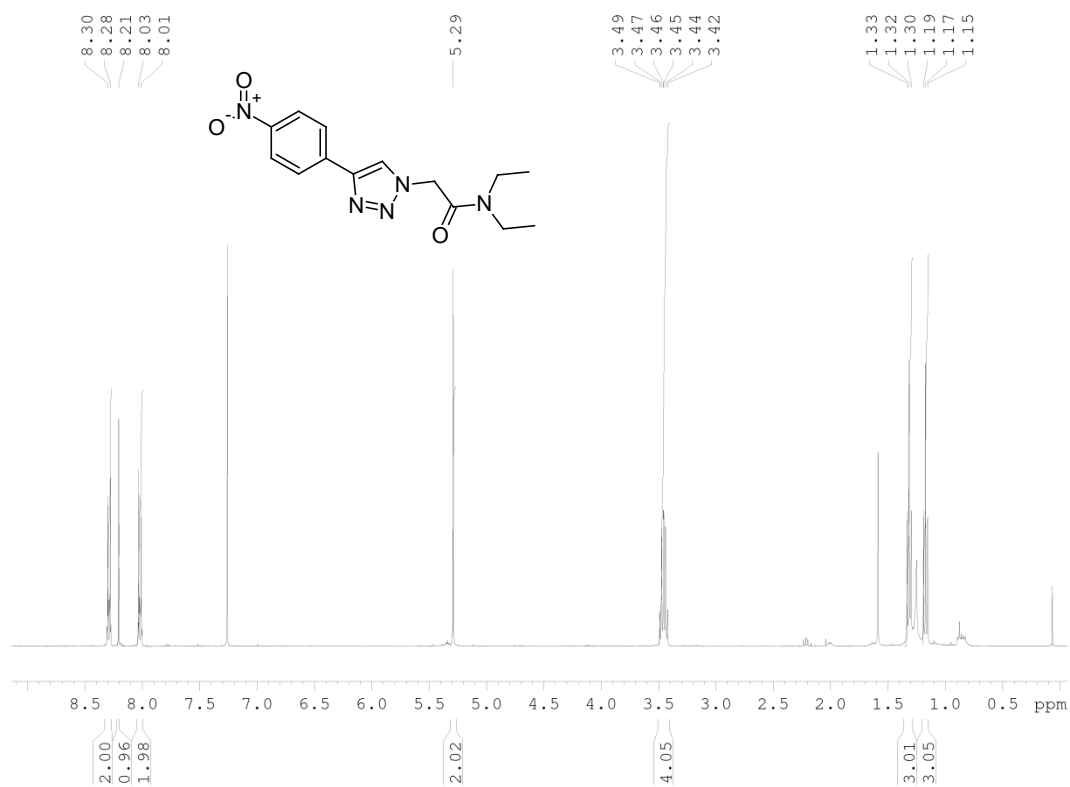

Supplement: Supplementary file 1 [file 64834ed7b30732d97ef4f25f.pdf]
